# Supplementary material
Source: publisher figshare collection journal article supplement (https://acs.figshare.com/ndownloader/files/24453571)
Supplement: Supplementary file 1 [file 24453571]

# Supporting Information

## Partial Pressure Assisted Growth of Single-Layer Graphene Grown by Low-Pressure Chemical Vapor Deposition: Implications for High-Performance Graphene FET Devices

*Indu Sharma<sup>†, \*</sup>, Girija Shankar Papanai<sup>†, ‡</sup>, Sharon Jyotika Paul<sup>†, §</sup> and Bipin Kumar Gupta<sup>†, ‡, \*</sup>*

<sup>†</sup> Photonic Materials Metrology Sub Division, Advanced Materials and Device Metrology Division, CSIR – National Physical Laboratory, New Delhi – 110012, India

<sup>‡</sup> Academy of Scientific and Innovative Research (AcSIR), Ghaziabad 201002, India

<sup>§</sup> Department of Chemistry, Institute of Basic Science, Bundelkhand University, Jhansi, Uttar Pradesh – 284128, India

### Corresponding Author

\*E-mail: Bipin Kumar Gupta: [bipinbhu@yahoo.com](mailto:bipinbhu@yahoo.com)

\*E-mail: Indu Sharma: [indusharma.86@gmail.com](mailto:indusharma.86@gmail.com)

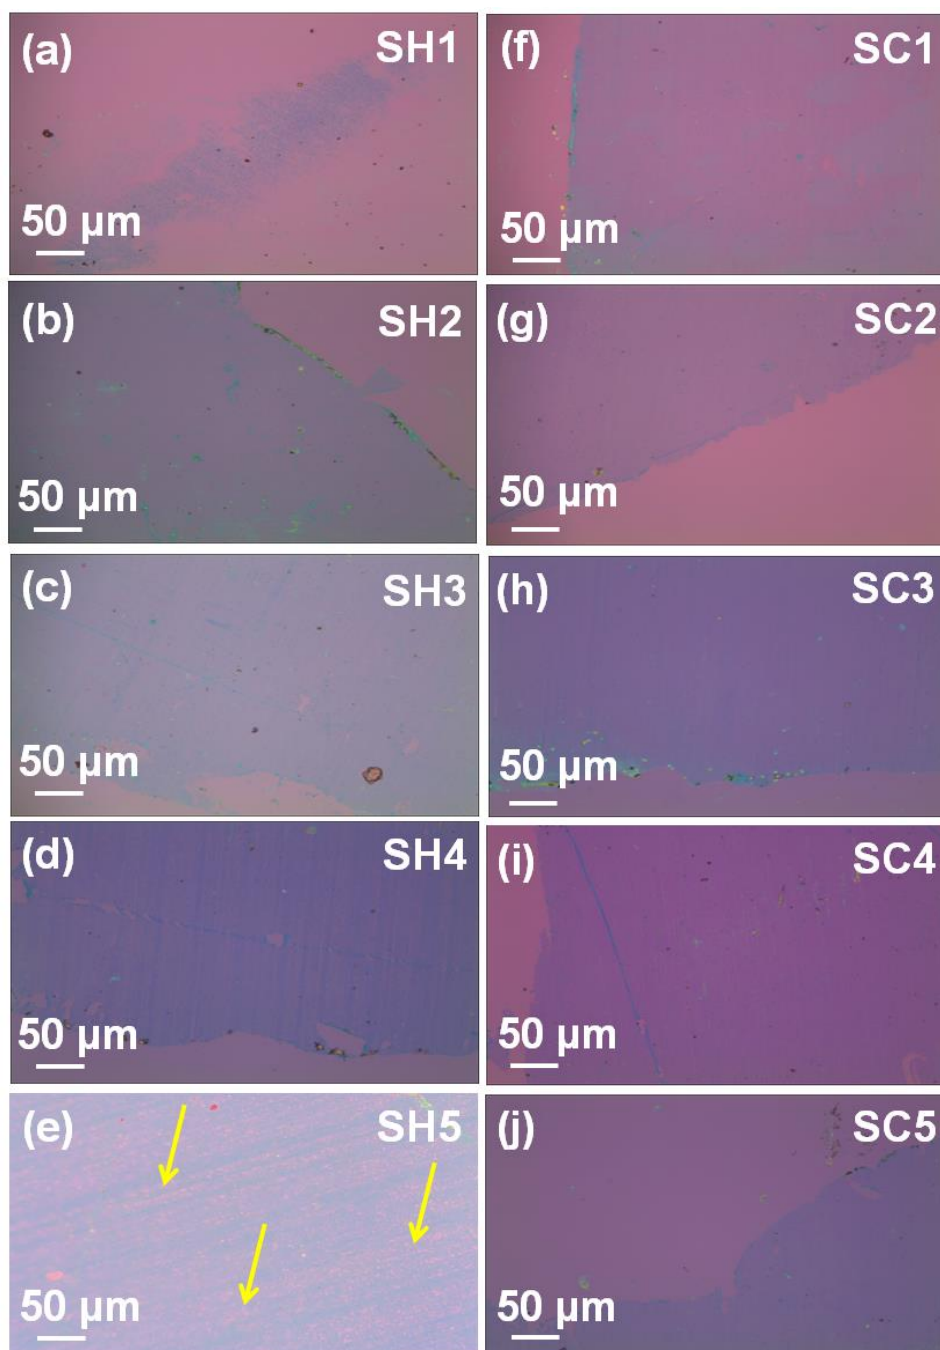

**Figure S1.** Optical images of graphene on Si/SiO<sub>2</sub> at different (a-e) hydrogen partial pressure (SH1-SH5), and (f-j) and methane partial pressure (SC1-SC5) (resolution 20×).

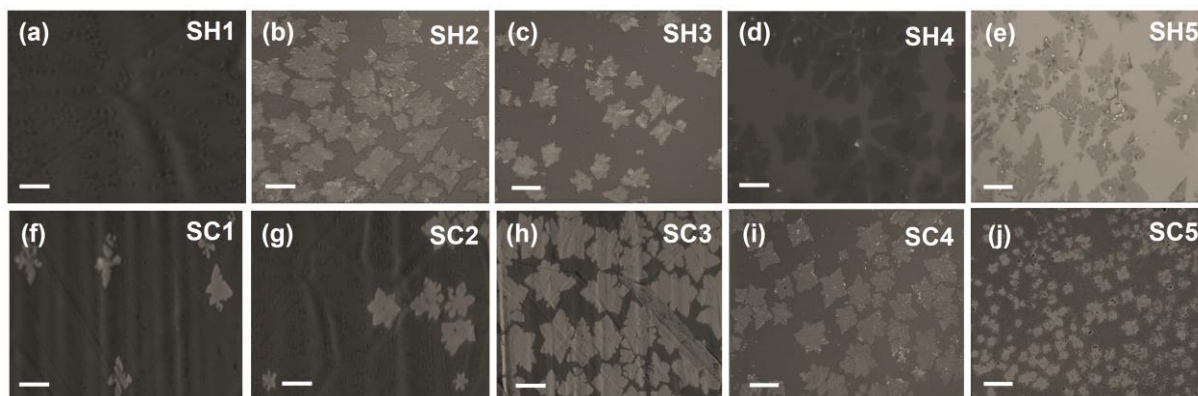

**Figure S2.** SEM images of graphene on Si/SiO<sub>2</sub> at different (a-e) hydrogen partial pressure (SH1-SH5), and (f-j) and methane partial pressure (SC1-SC5) Scale bars are 50  $\mu\text{m}$ .

**Table S1.** Nucleation density of graphene at different hydrogen partial pressures (SH1-SH5) and methane partial pressure (SC1-SC5).

| Sample | Estimated<br>Nucleation density<br>$\times 10^2$ (nuclei $\text{cm}^{-2}$ ) | Sample | Estimated<br>Nucleation density<br>$\times 10^2$ (nuclei $\text{cm}^{-2}$ ) |
|--------|-----------------------------------------------------------------------------|--------|-----------------------------------------------------------------------------|
| SH1    | 0                                                                           | SC1    | $\sim 49$                                                                   |
| SH2    | $\sim 237$                                                                  | SC2    | $\sim 115$                                                                  |
| SH3    | $\sim 171$                                                                  | SC3    | $\sim 253$                                                                  |
| SH4    | $\sim 122$                                                                  | SC4    | $\sim 310$                                                                  |
| SH5    | $\sim 147$                                                                  | SC5    | $\sim 816$                                                                  |

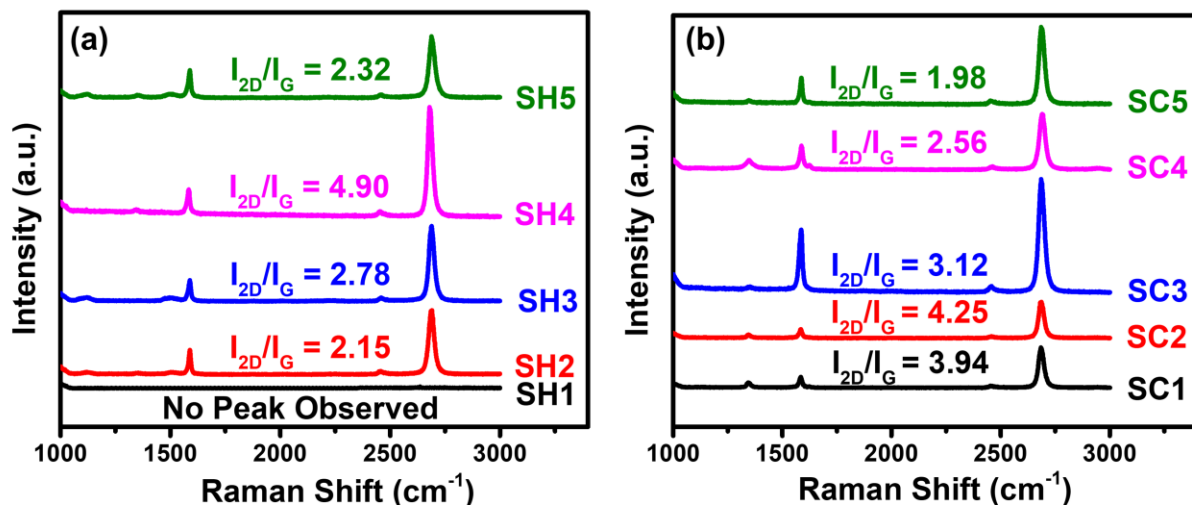

**Figure S3.** Raman spectra of CVD graphene grains after transfer on Si/SiO<sub>2</sub> substrate at different (a) hydrogen partial pressure (SH1-SH5), and (b) methane partial pressure (SC1-SC5).

**Table S2.** Comparative Raman data analysis of graphene grains at different hydrogen partial pressures (SH1-SH5) and methane partial pressure (SC1-SC5).

| P(H <sub>2</sub> )<br>(Torr) |                     |                                 |              |                                | P(CH <sub>4</sub> )<br>(Torr) |                     |                                 |              |                                |
|------------------------------|---------------------|---------------------------------|--------------|--------------------------------|-------------------------------|---------------------|---------------------------------|--------------|--------------------------------|
| Sample                       | Position            | I <sub>2D</sub> /I <sub>G</sub> | 2D<br>(FWHM) | I <sub>D</sub> /I <sub>G</sub> | Sample                        | Position            | I <sub>2D</sub> /I <sub>G</sub> | 2D<br>(FWHM) | I <sub>D</sub> /I <sub>G</sub> |
| SH1                          | ----                | ----                            | ----         | ----                           | SC1                           | G ~1584<br>2D ~2685 | ~ 3.94                          | ~ 30         | ~ 0.2                          |
| SH2                          | G ~1587<br>2D ~2688 | ~ 2.15                          | ~31          | ~0.1                           | SC2                           | G ~1585<br>2D ~2686 | ~ 4.25                          | ~27          | ----                           |
| SH3                          | G ~1588<br>2D ~2687 | ~ 2.78                          | ~31          | ~ 0.4                          | SC3                           | G ~1586<br>2D ~2688 | ~ 3.12                          | ~ 31         | < 0.1                          |
| SH4                          | G ~1583<br>2D ~2682 | ~ 4.90                          | ~ 27         | ~ 0.1                          | SC4                           | G ~1587<br>2D ~2690 | ~ 2.56                          | ~ 33         | ~ 0.3                          |
| SH5                          | G ~1587<br>2D ~2690 | ~ 2.32                          | ~ 33         | ~ 0.1                          | SC5                           | G ~1584<br>2D ~2687 | ~ 1.98                          | ~ 33         | ~ 0.1                          |
